# Supplementary material
Source: PubMed Central journal article supplement (PMC3077243)
Supplement: embor201111s2.pdf [file embor201111s2.pdf]

Manuscript EMBOR-2010-34642

## **Reprogramming of mouse and human somatic cells by high performance engineered factors**

Mr. Yang Wang, Mr. Jiekai Chen, Mr. Jia-Lei Hu, Mr. Xi-Xiao Wei, Mr. Dajiang Qin, Ms. Juan Gao, Mr. Lei Zhang, Ms. Jing Jiang, Jin-Song Li, Mr. Jing Liu, Mr. Ke-Yu Lai, Ms. Xia Kuang, Jian Zhang, Duanqing Pei, Guoliang Xu

*Corresponding author: Guoliang Xu, Institute of Biochemistry and Cell Biology, Shanghai Institutes for Biological Sciences, Chinese Academy of Sciences*

---

**Review timeline:**

Submission date:

13 December 2010

Accepted:

20 January 2011

---

**No Peer Review Process File is available with this article, as the authors have chosen not to make the review process public in this case.**
